# Supplementary material
Source: ML conference proceedings conference paper supplement (https://openreview.net/forum?id=WW6O-e7YJ2O)

# Experimental outcomes

Genes

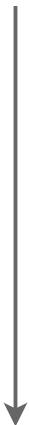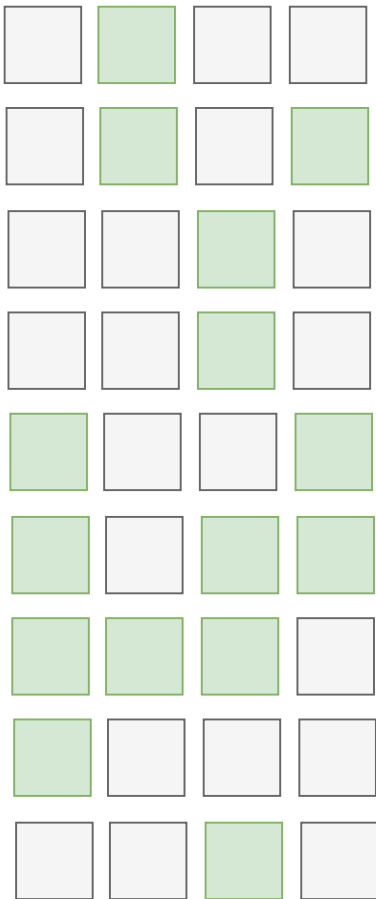

Supplement: supplementary_material [file attachment]

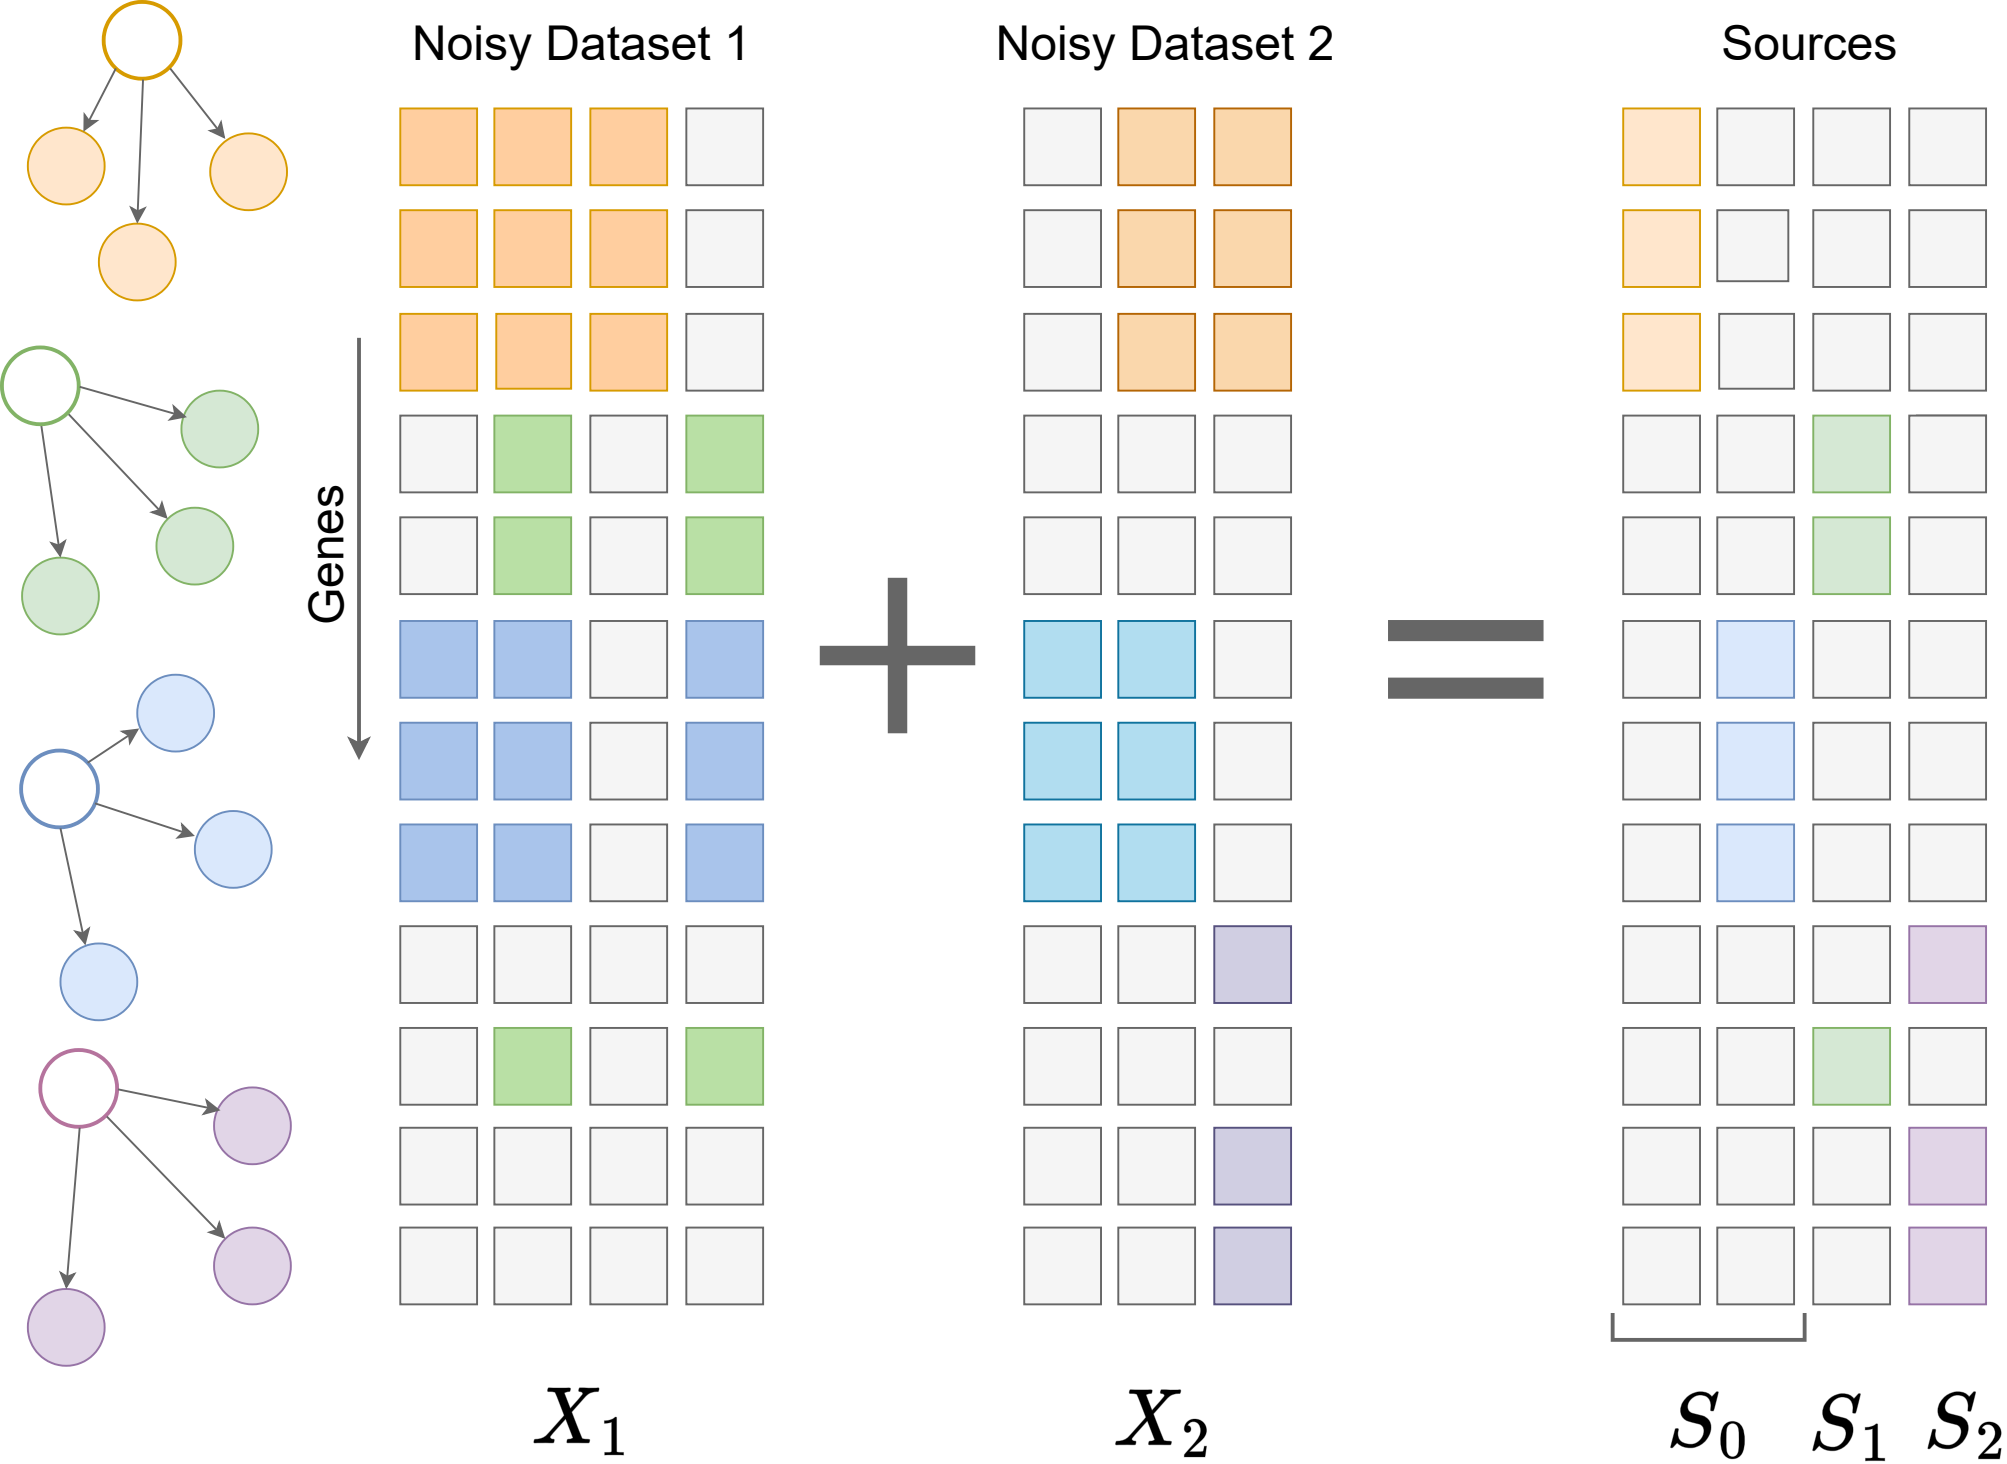

Supplement: supplementary_material [file attachment]
